# Supplementary material for: Dexamethasone rescues TGF-β1-mediated β2-adrenergic receptor dysfunction and attenuates phosphodiesterase 4D expression in human airway smooth muscle cells
Source: Springer Nature journal article supplement (doi:10.1186/s12931-020-01522-w), 2020-10-08

Donor Characteristics\*

|                        |               |
|------------------------|---------------|
| Sex, M/F               | 27/14         |
| Age, y/o               | 30.88 (14.07) |
| Race, C/B/H            | 28/7/6        |
| BMI, kg/m <sup>3</sup> | 26.88 (6.74)  |

Data represents means (SD); n=41 donors. M, male; F, female;  
C, caucasian; B, black; H, Hispanic; BMI, body mass index

\* Donors died of head trauma or cardiovascular incident, including stroke

**Table S1: Donor demographics for cAMP and *pde4d* expression studies.** All cells were derived from subjects with no history of chronic disease.

Figure 1

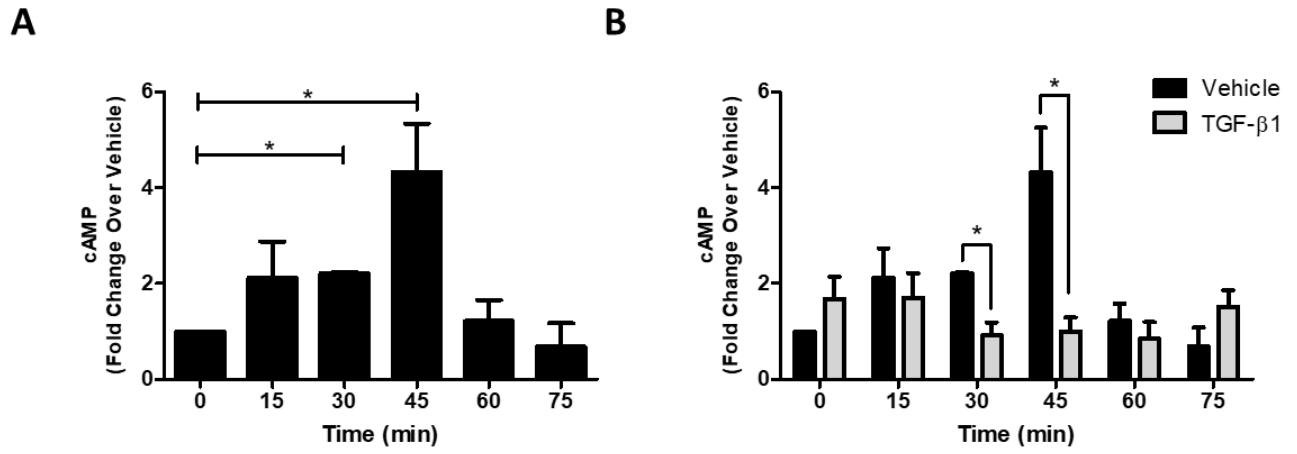

Figure 2

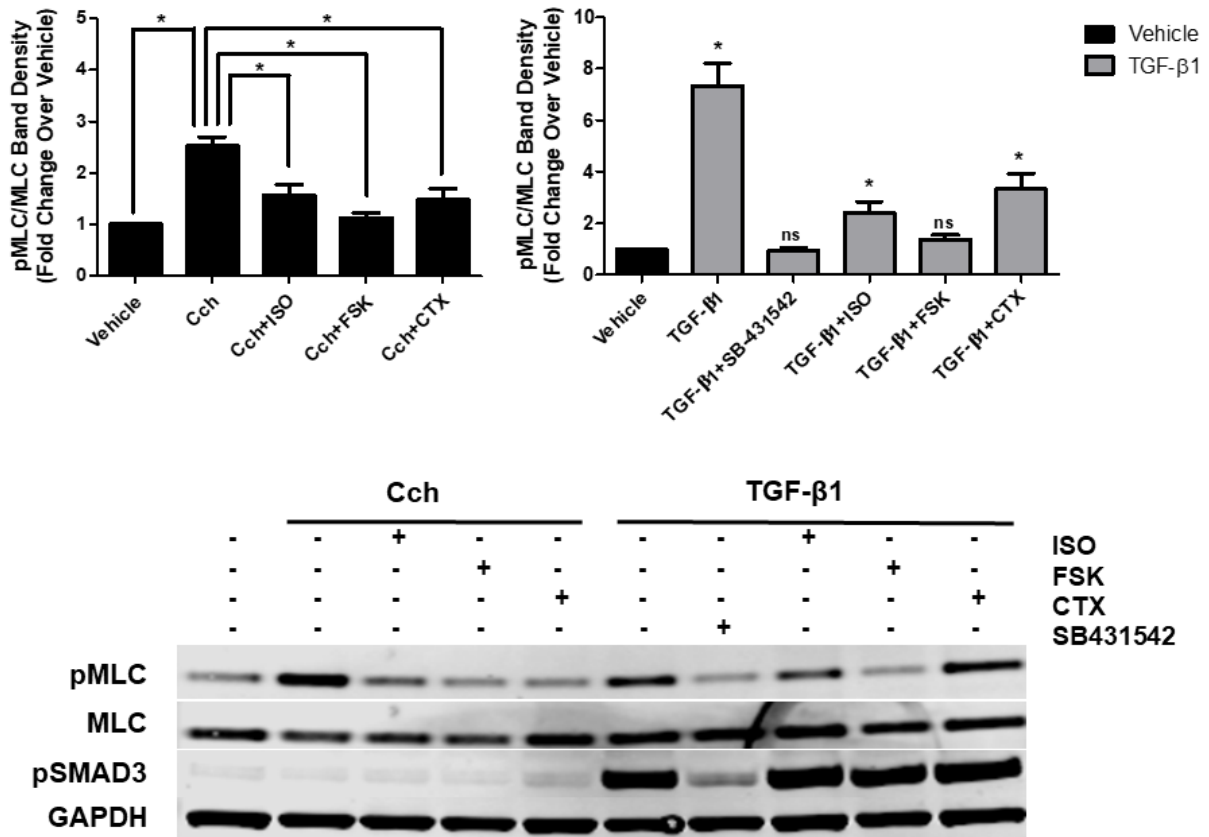

Figure 3

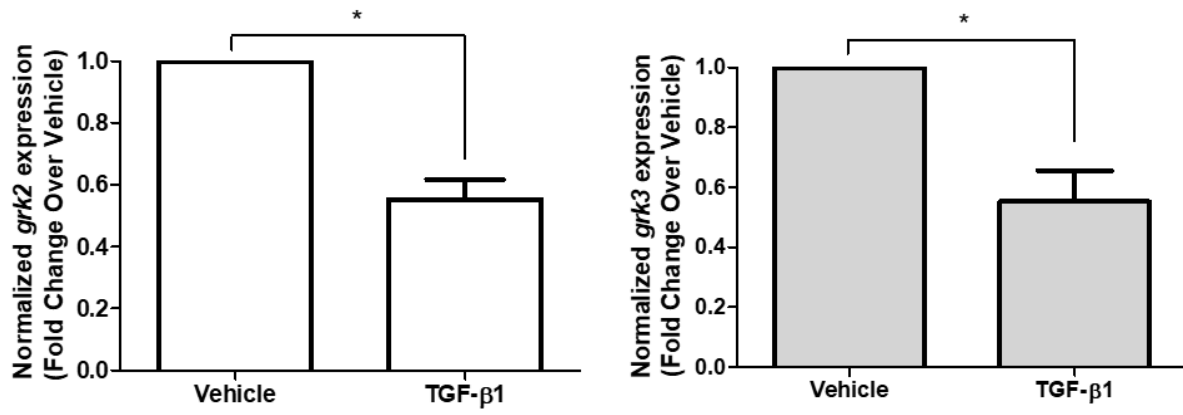

Figure 4

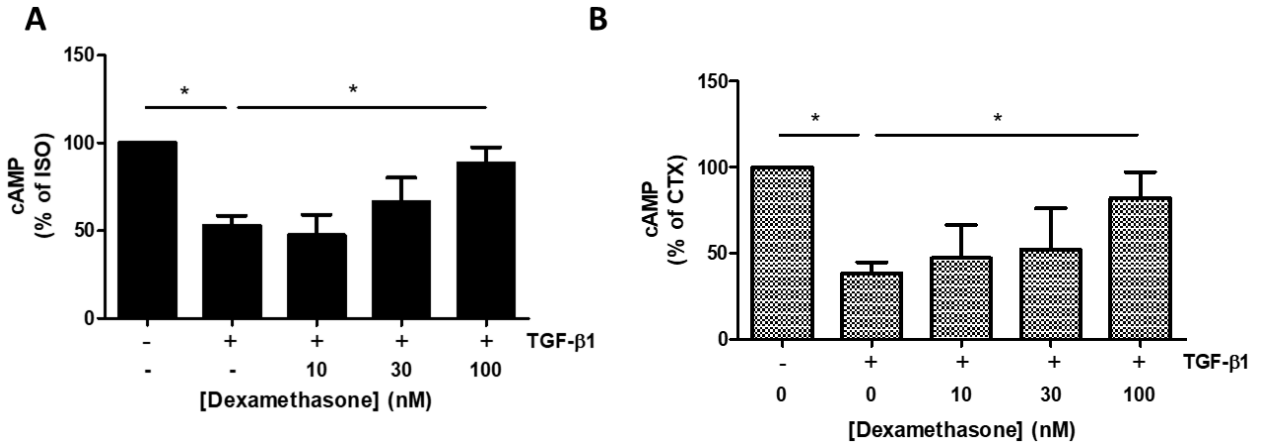

Figure 5

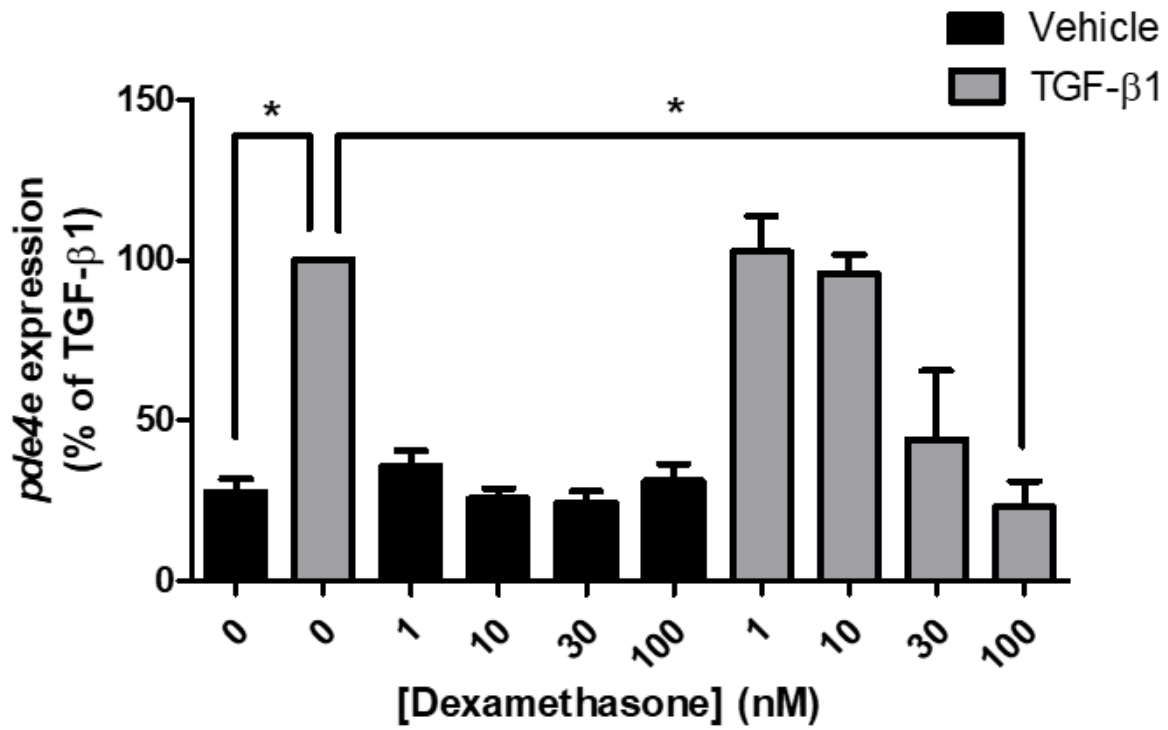

Figure 6

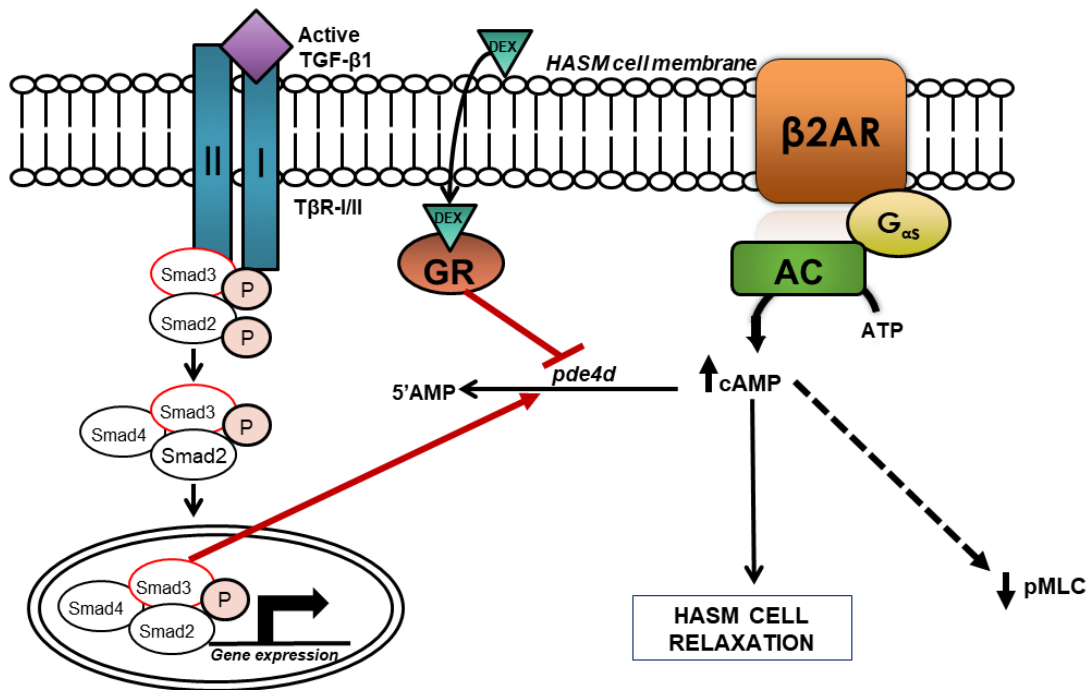

Supplement: MOESM1 [file 18463590]
